# Supplementary material for: Punicic Acid Triggers Ferroptotic Cell Death in Carcinoma Cells
Source: MDPI journal article supplement (doi:10.3390/nu13082751), 2021-08-10
Supplement: s1 [file s1]

## SUPPLEMENTARY MATERIALS

# Punicic Acid Triggers Ferroptotic Cell Death in Carcinoma Cells

Perrine Vermonden <sup>1</sup>, Matthias Vancoppenolle <sup>1</sup>, Emeline Dierge <sup>1,2</sup>, Eric Mignolet <sup>1</sup>, Géraldine Cuvelier <sup>1</sup>, Bernard Knoops <sup>1</sup>, Melissa Page <sup>1</sup>, Cathy Debier <sup>1</sup>, Olivier Feron <sup>2,†</sup> and Yvan Larondelle <sup>1,\*,†</sup>

<sup>1</sup> Louvain Institute of Biomolecular Science and Technology (LIBST), UCLouvain, Croix du Sud 4-5/L7.07.03, B-1348 Louvain-la-Neuve, Belgium; perrine.vermonden@uclouvain.be (P.V.); matthias.vancoppenolle@uclouvain.be (M.V.); emeline.dierge@uclouvain.be (E.D.); eric.mignolet@uclouvain.be (E.M.); geraldine.cuvelier@uclouvain.be (G.C.); bernard.knoops@uclouvain.be (B.K.); melissa.page@uclouvain.be (M.P.); cathy.debier@uclouvain.be (C.D.)

<sup>2</sup> Pole of Pharmacology and Therapeutics (FATH), Institut de Recherche Expérimentale et Clinique (IREC), UCLouvain, 57 Avenue Hippocrate B1.57.04, B-1200 Brussels, Belgium; olivier.feron@uclouvain.be

\* Correspondence: yvan.larondelle@uclouvain.be; Tel.: +32-478449925

† These authors have equally supervised this work.

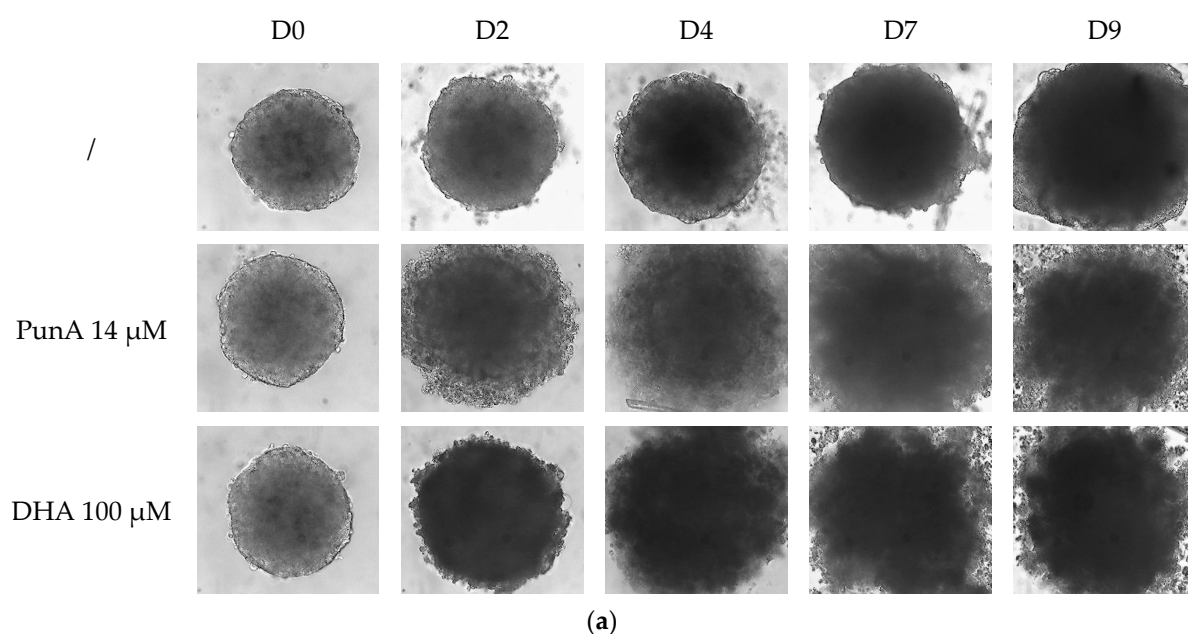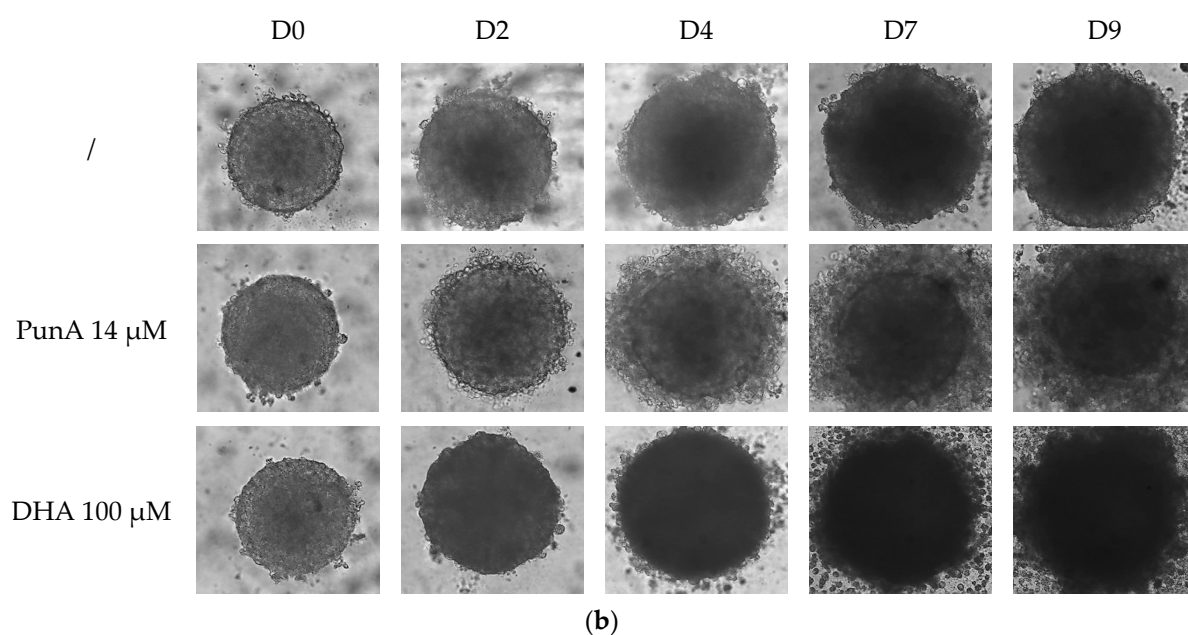

**Figure S1.** Morphological characterization of HCT-116 and FaDu 3D spheroids treated with punicalic acid (PunA) or docosahexaenoic acid (DHA). Representative pictures of (a) HCT-116 and (b) FaDu 3D spheroids treated with a control, PunA 14  $\mu$ M or DHA 100  $\mu$ M over 9 days.

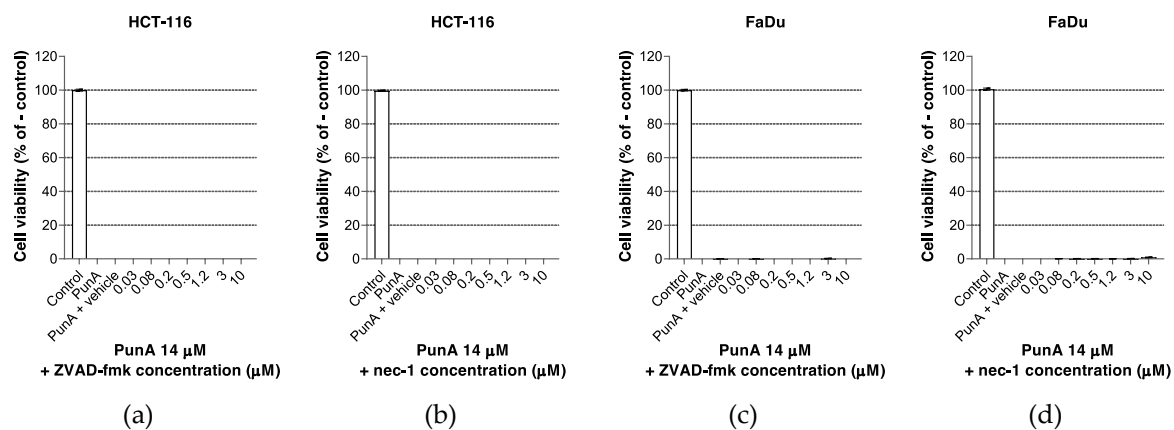

**Figure S2.** Neither the apoptosis inhibitor ZVAD-fmk nor the necroptosis inhibitor necrostatin-1 prevent punical acid (PunA) cytotoxicity. (a–b) Viability of HCT-116 carcinoma cells in the presence of PunA 14  $\mu\text{M}$  and an increasing dose of (a) ZVAD-fmk or (b) necrostatin-1 (nec-1). (c–d) Viability of FaDu carcinoma cells in the presence of PunA 14  $\mu\text{M}$  and an increasing dose of (c) ZVAD-fmk or (d) necrostatin-1 (nec-1). Control: cells supplemented with DMEM cell culture medium without added fatty acid. Vehicle: DMSO (0.4% *v/v*). Results are expressed as mean  $\pm$  standard error of the mean of three independent repetitions. Significance is established in relation to the PunA + vehicle condition.

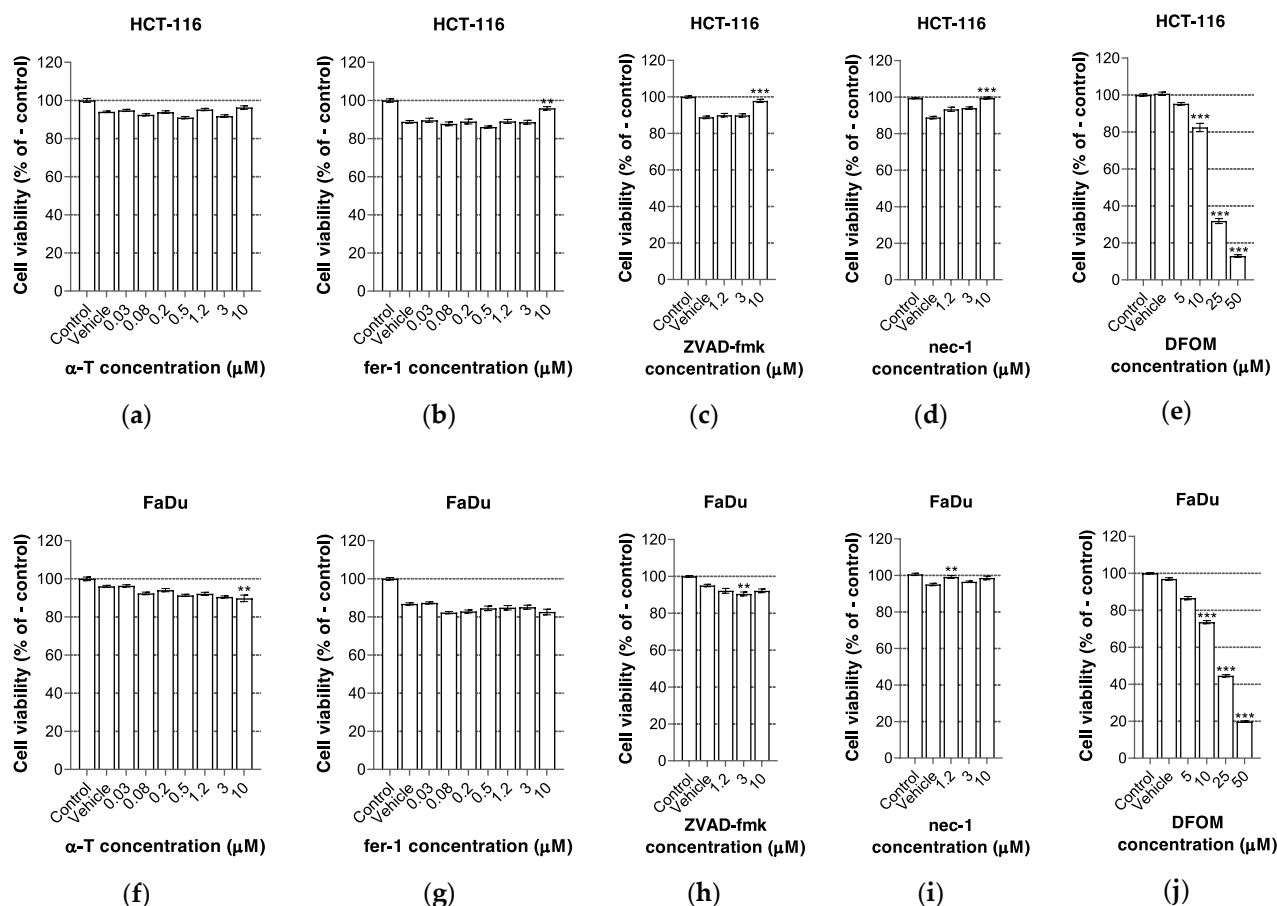

**Figure S3.** None of the inhibitors have a cytotoxic effect when applied alone whereas iron chelation impacts on cell viability. (a–e) Viability of HCT-116 carcinoma cells in the presence of an increasing dose of (a)  $\alpha$ -tocopherol ( $\alpha$ -T), (b) ferrostatin-1 (fer-1), (c) ZVAD-fmk, (d) necrostatin-1 (nec-1) or (e) deferoxamine mesylate (DFOM). (f–j) Viability of FaDu carcinoma cells in the presence of an increasing dose of (a)  $\alpha$ -T, (b) fer-1, (c) ZVAD-fmk, (d) nec-1 or (e) DFOM. Control: cells supplemented with DMEM cell culture medium without added compounds. Vehicle: ethanol absolute for  $\alpha$ -T (0.4% v/v) or DMSO for fer-1, ZVAD-fmk, nec-1 or DFOM (0.4% v/v). Results are expressed as mean  $\pm$  standard error of the mean of three independent repetitions. Significance is established in relation to the vehicle condition. \*\*  $p \leq 0.00125$  (for  $\alpha$ -T and fer-1); \*\*  $p \leq 0.0025$  (for ZVAD-fmk and nec-1); \*\*\*  $p \leq 0.0001$ .

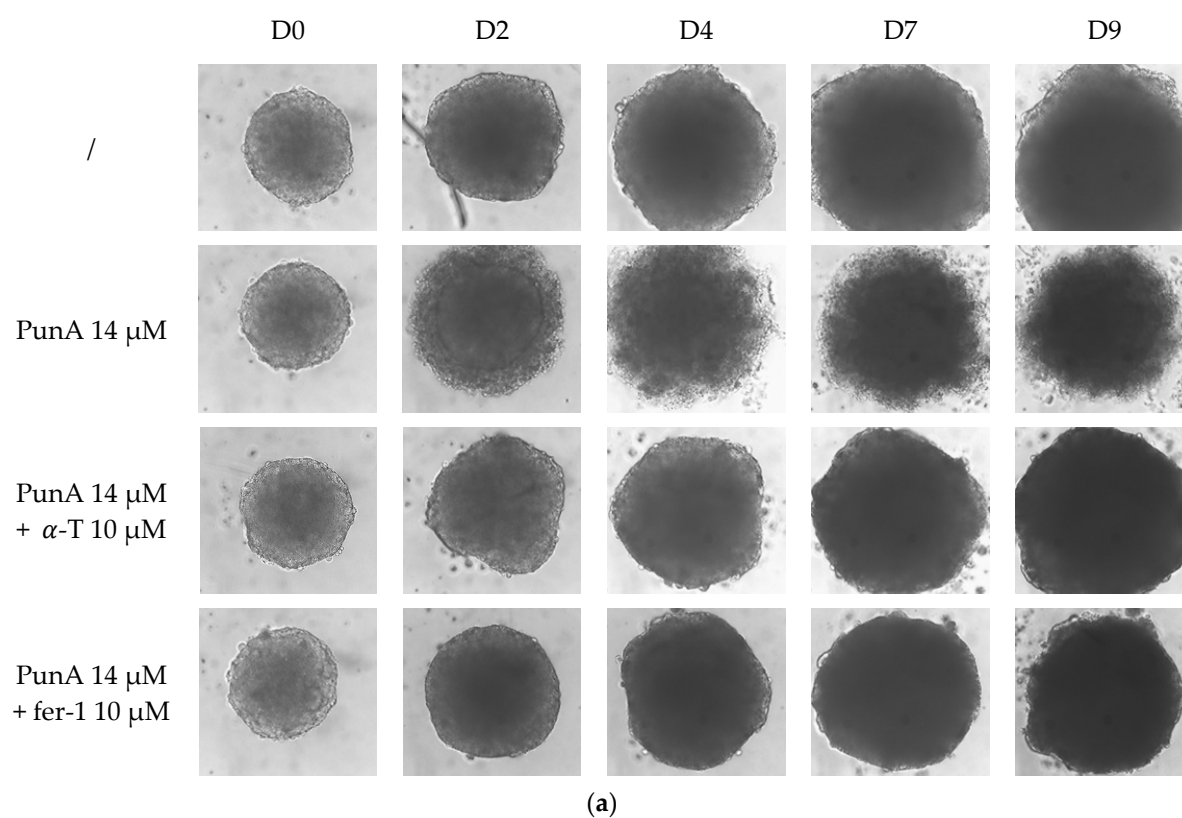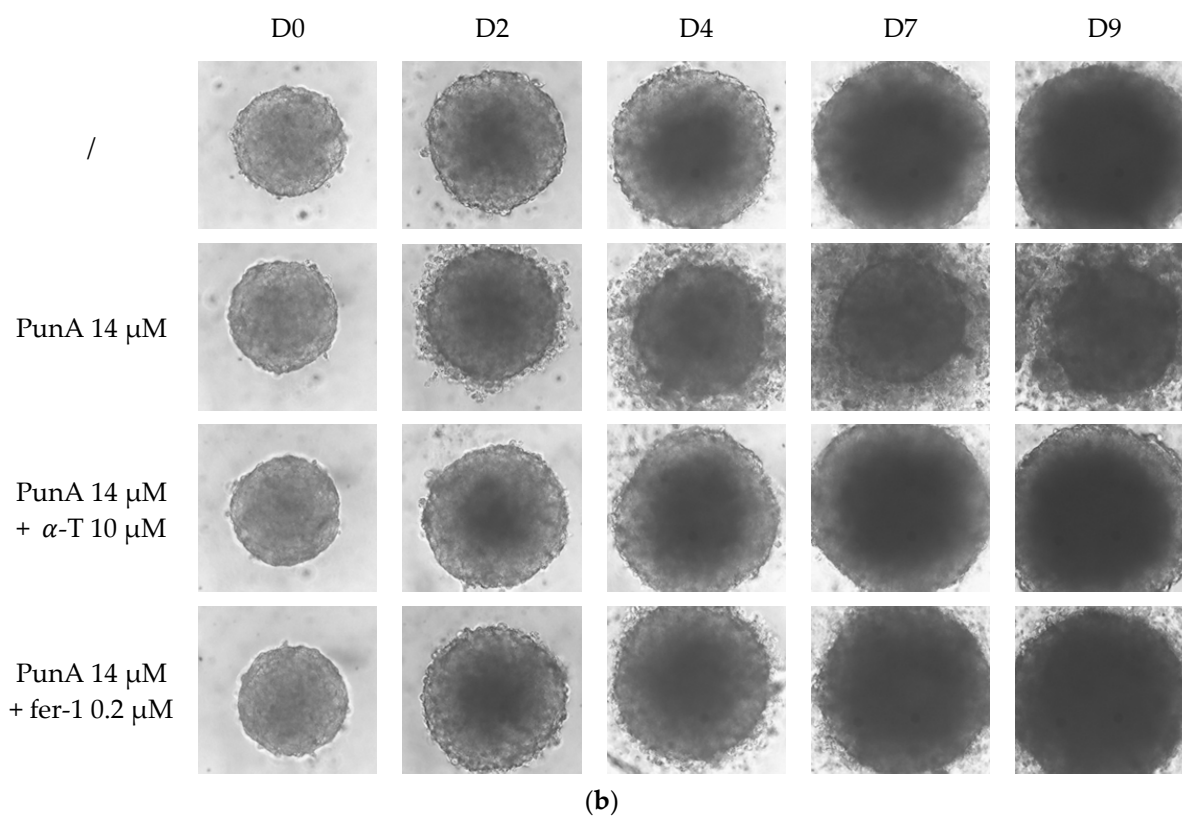

**Figure S4.** Morphological characterization of HCT-116 and FaDu 3D spheroids treated with punical acid (PunA) and/or ferroptosis inhibitors. Representative pictures of (a) HCT-116 and (b) FaDu 3D spheroids treated with a control, PunA 14  $\mu$ M, PunA 14  $\mu$ M +  $\alpha$ -tocopherol 10  $\mu$ M ( $\alpha$ -T) or PunA 14  $\mu$ M + ferrostatin-1 (fer-1) 0.2 or 10  $\mu$ M over 9 days.

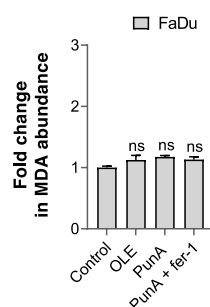

**Figure S5.** Punicic acid (PunA) treatment for 18 hours does not increase lipid peroxidation in FaDu carcinoma cells. Fold change in MDA abundance (nmol MDA/mg protein) compared to the control for FaDu carcinoma cells treated with OLE 50  $\mu$ M, PunA 14  $\mu$ M or PunA 14  $\mu$ M + fer-1 10  $\mu$ M for 18 hours. Control: cells supplemented with DMEM cell culture medium. Results are expressed as mean  $\pm$  SEM of three independent repetitions. Significance is established in relation to the control. ns, non-significant.
